# Supplementary figures and images for: A new droplet-forming fluidic junction for the generation of highly compartmentalised capsules
Source: Royal Society of Chemistry journal article supplement (doi:10.1039/c7lc00618g), 2017-01-01

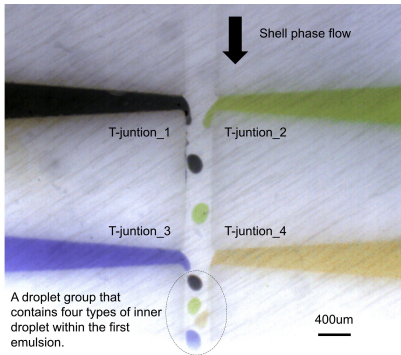

Supplement: c7lc00618g2.pdf [file c7lc00618g2.pdf]
